# Supplementary material for: Inversed impaired osteogenic activity in children with severe obesity due to MC4R deficiency compared to LEP and LEPR deficiency
Source: Research Square preprint supplement (doi:10.21203/rs.3.rs-6595544/v1), 2025-05-20
Supplement: Supplementary file 1 [file 4c8cd44d978b78097b1c781b.xlsx]

## Sheet: Sheet1
Table 2: Metabolic hormone levels in children with severe obesity
Subjects with variants in
Characteristic	LEP	LEPR	MC4R	SvOb 1	NWC 2
N	23	10	8	13	15
Osteocalcin (ng/ml)	54.3±7.2 c, e	43.1±8.5 c, e	185.2±25.3 a, b, d, e	70.4±7.2 c	107.7±10.8 a, b, c
Osteopontin (ng/ml)	7.7±0.8 c, e	6.8±0.9 c, e	18.4±0.7 a, b, d	8.0±0.7 c, e	17.9±2.0 a, b, d
Sclerostin (pg/ml)	1016±93	1164±142	713±61	1176±132	927±129
Osteoprotegerin (pg/ml)	369±13	371±17	387±25	390±14	388±29
Leptin (ng/ml)	0.0±0.0 b, c, d	50.5±5.4 a, c, d, e	32.5±5.6 a, b, e	20.5±3.1 a, b, e	3.2±0.6 b, c, d
Insulin (uIU/ml)	14.4±2.8 c	17.5±2.8 c	48.5±10.2 a, b, e	32.0±8.7 e	7.7±0.8 c, d
Cortisol (µg/dl)	23.0±1.9 b, c, d, e	15.3±2.3 a	10.0±1.1 a	11.3±1.3 a	11.5±0.4 a
1 Children with severe obesity with unknown genetic etiology
2 Children with normal body weight
Significant difference (Scheff’s multiple t test; P <0.05): a vs LEP; b vs LEPR; c vs MC4R; d vs SvOb, e vs NWC
