# Supplementary material for: Inversed impaired osteogenic activity in children with severe obesity due to MC4R deficiency compared to LEP and LEPR deficiency
Source: Research Square preprint supplement (doi:10.21203/rs.3.rs-6595544/v1), 2025-05-20
Supplement: Supplementary file 2 [file 84a8b7c268495cd6daec2a1b.xlsx]

## Sheet: Sheet1
Table 1: Physical characteristics of children with severe obesity
Subjects with variants in
Characteristic	LEP	LEPR	MC4R	SvOb 1	NWC 2
N	23	10	8	13	15
M / F ratio	9/14	6/4	4/4	8/5	9/6
Age (years)	2.0±0.6 c, e	1.8±0.4 c, e	6.7±0.6 a, b, d	3.3±0.7 c, e	6.7±0.5 a, b, d
Height (cm)	81.4±4.1 c, e	83.3±5.8 c, e	124.9±4.4 a, b, d	96.0±6.2 c	113.0±3.1 a, b
Weight (kg)	25.0±4.7 c	20.7±2.7 c	57.1±7.2 a, b, d, e	31.0±4.3 c	21.8±2.0 c
BMI SDS* for age	8.0±0.6 e	7.5±1.0 e	7.8±0.7 e	8.1±0.9 e	0.4±0.3 a, b, c, d
BMI	32.9±1.6 e	29.5±1.7 e	35.5±2.2 e	31.4±1.6 e	16.7±0.8 a, b, c, d
1 Children with severe obesity with unknown genetic etiology
2 Children with normal body weight
*WHO Anthro, v 3.2.2; AnthroPlus, v 1.0.4; Values represent mean±SEM
Significant difference (Scheff’s multiple t test; P <0.05): a vs LEP; b vs LEPR; c vs MC4R; d vs SvOb, e vs NWC
